# Supplementary material
Source: Springer Nature journal article supplement (https://www.springermedizin.de/resource/supplementary/12936_2006_242_MOESM4_ESM.pdf/9547282)

**A**

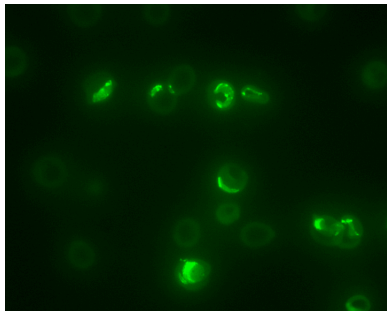

**B**

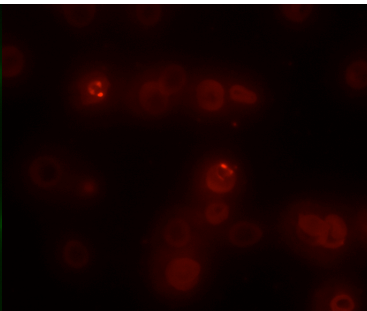

**C**

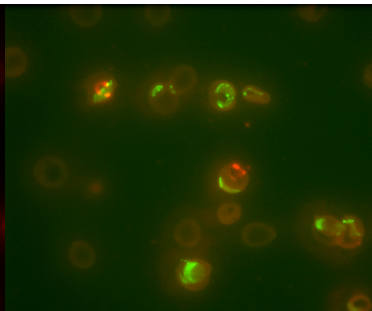

**D**

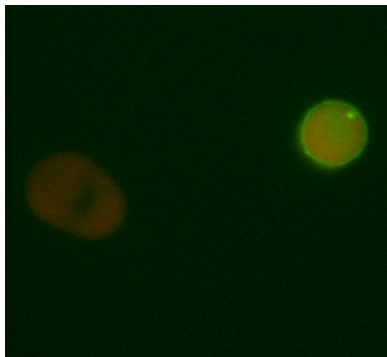

Supplement: MOESM4 [file 9547282]
